# Supplementary material for: Machine Learning‐Enabled Tactile Sensor Design for Dynamic Touch Decoding
Source: PubMed Central journal article supplement (PMC10646241; doi:10.1002/advs.202303949), 2023-09-22
Supplement: ADVS-10-2303949-s003.pdf [file ADVS-10-2303949-s003.pdf]

## Supporting Information

for *Adv. Sci.*, DOI 10.1002/adv.202303949

Machine Learning-Enabled Tactile Sensor Design for Dynamic Touch Decoding

*Yuyao Lu, Depeng Kong, Geng Yang\**, Ruohan Wang, Gaoyang Pang, Huayu Luo, Huayong Yang  
and Kaichen Xu\*

---

**Algorithm 1** Extract data samples of a particular class

---

**Input:** anchor sample:  $a(t)$ , time series:  $X(t)$ , sliding step:  $\tau$ , similarity metric:  $S(x_i, x_j)$ , number of target samples:  $N$ .

**Output:** list  $C$ , which contains cut samples.

```

1:  $L \leftarrow \text{length}[X(t)]$  ▷ length of time series  $X(t)$ 
2:  $W \leftarrow \text{length}[a(t)]$  ▷ length of anchor sample  $a(t)$ 
3:  $I \leftarrow (L - W) // \tau$  ▷ iterations cost for searching
4:  $C \leftarrow []$  ▷ empty list for saving cut samples
5:  $\text{sim\_list} \leftarrow 0_{[I \times 1]}$  ▷ array for saving calculated similarities
6: for  $i = 1 \rightarrow I$  do
7:    $\text{temp} = X[i \times \tau : (i + 1) \times \tau]$ 
8:   if  $\text{length}(\text{temp}) == W$  then
9:      $\text{sim} \leftarrow S(a, \text{temp})$ 
10:     $\text{sim\_list}[i] \leftarrow \text{sim}$ 
11:    append  $\text{temp}$  to  $C$ 
12:   end if
13: end for
14: rank  $C$  refer to  $\text{sim\_list}$  in descending order.
15:  $C \leftarrow C[0 : N]$ 
16: return  $C$ 

```

---
